# Supplementary material
Source: PubMed Central journal article supplement (PMC3643397)
Supplement: supp_13-11791_IOVS-13-11791-s01.pdf [file supp_13-11791_IOVS-13-11791-s01.pdf]

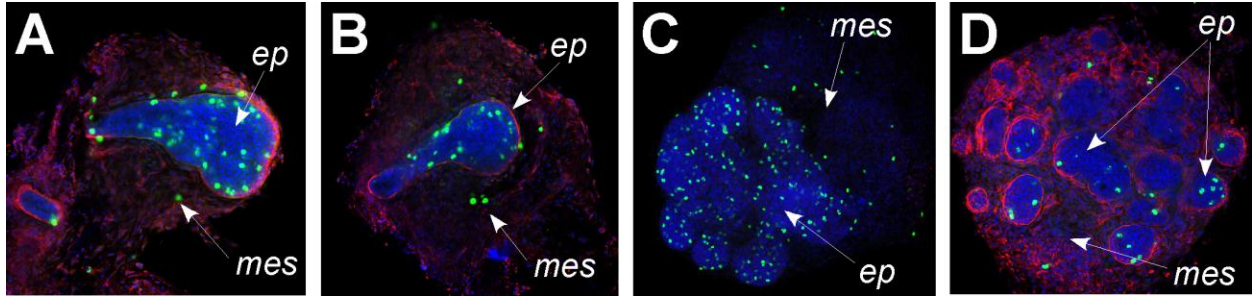

Supplementary Figure 1. During LG development, epithelial component of the gland is highly proliferative. LGs at E 15.5 (A, B) and E17.5 (C, D) were immunostained with the histone-3-phospho (H3-P) antibody (green) to visualize cell proliferation and with laminin antibody (A, B, D, Sigma), to outline epithelial component of the gland (red). Nuclei were stained with DAPI (blue). Number of proliferating cells is much higher in the epithelium than in the mesenchyme. Ep –epithelium, mes –mesenchyme.
